# Supplementary material
Source: publisher figshare collection journal article supplement (https://gsajournals.figshare.com/ndownloader/files/25741487)
Supplement: Supplementary file 1 [file 25741487]

## Sheet: Sheet1
Table S4. Population prevalence of each configuration.
category	configuration	AFR	AMR	EAS	EUR	SAS
7q11.23 large inversion	reference	9	9	18	12	11
	inversion	1	0	1	1	0
7q11.23 SDII inversion	reference	36	20	28	28	23
	inversion	2	5	3	2	1
7q11.23 A-CNV	0x	19	7	13	7	14
	1x	29	22	23	29	24
	2x	32	14	21	15	14
	3x	17	16	22	23	18
	4x	13	6	6	7	3
	5x	5	0	0	5	1
	6x	2	1	2	0	1
	>6	1	0	0	0	1
	partial	19	0	0	0	0
	downstream_variant	5	0	3	0	1
15q13.3 G1	G1-1	33	18	23	30	24
	G1-2	9	3	4	3	1
	G1-3	2	0	1	0	2
	G1-4	5	2	1	0	3
15q13.3 G2	G2-1	16	12	22	12	11
	G2-2	7	5	0	11	7
	G2-3	1	0	0	0	0
15q13.3 G3 DLE-1	G3-1	0	2	0	1	0
	G3-2	0	0	1	0	0
	G3-3	1	0	0	1	1
	G3-4	0	1	0	0	0
15q13.3 G3 Nt.BspQI	G3-3	0	1	3	6	1
	G3-4	0	1	0	0	0
15q13.3 G4 proximal (DLE-1)	G4-1	7	5	4	7	5
	G4-2	0	1	0	0	1
	G4-3	1	2	1	0	0
	G4-4	1	0	0	0	0
	G4-5	1	0	0	0	0
15q13.3 G4 distal (DLE-1)	G4-1	12	6	9	9	7
	G4-2	0	1	0	0	1
	G4-3	1	2	2	0	1
	G4-4	1	0	0	0	0
15q13.3 G4 proximal (Nt.BspQI)	G4-1	22	12	13	9	16
	G4-2	1	1	0	0	2
	G4-3	3	2	4	1	3
	G4-4	1	0	2	0	0
16p12.2 G1	G1-1	22	11	17	21	14
	G1-2	0	3	5	1	5
	G1-3	0	0	1	0	1
16p12.2 G2	G2-1	16	9	14	16	7
	G2-2	1	0	1	1	1
	G2-3	0	0	0	2	0
	G2-4	0	0	0	0	0
16p12.2 G3	G3-1	19	14	13	18	14
	G3-2	1	1	9	0	2
	G3-3	0	1	1	0	0
Numbers in the table refer to the number of times that each configuration was detected in the population, independent of the number of molecules supporting each case.
